# Supplementary material for: The genome of the naturally evolved obesity-prone Ossabaw miniature pig
Source: PubMed Central journal article supplement (PMC8455653; doi:10.1016/j.isci.2021.103081), 2021-09-03
Supplement: mmc1.pdf [file mmc1.pdf]

**iScience, Volume 24**

**Supplemental information**

**The genome of the naturally evolved  
obesity-prone Ossabaw miniature pig**

**Yaolei Zhang, Guangyi Fan, Xin Liu, Kerstin Skovgaard, Michael Sturek, and Peter M.H. Heegaard**

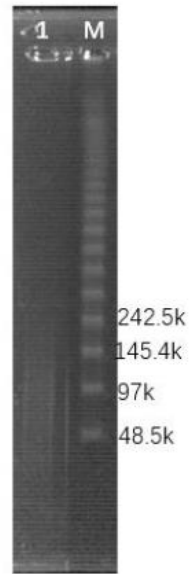

**Figure S1. DNA quality assessment by using pulsed field gel electrophoresis, Related to Figure 1.**

Parameter: “Run time: 16h; Cooling temperature: 14 centigrade; Volt/s: 6V/cm; Initial switch time: 0.22s; Final switch time: 44.69s”.

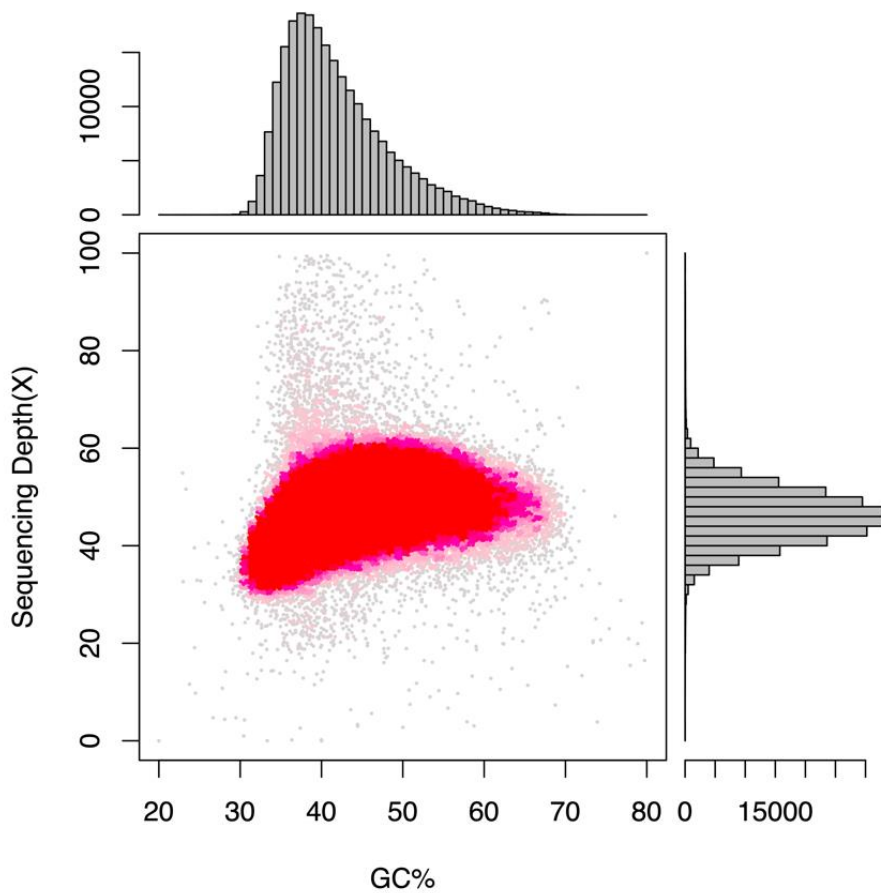

**Figure S2. GC content and sequencing depth of Ossabaw genome with 10 Kb bins using ~130 Gb short reads, Related to Figure 1.**

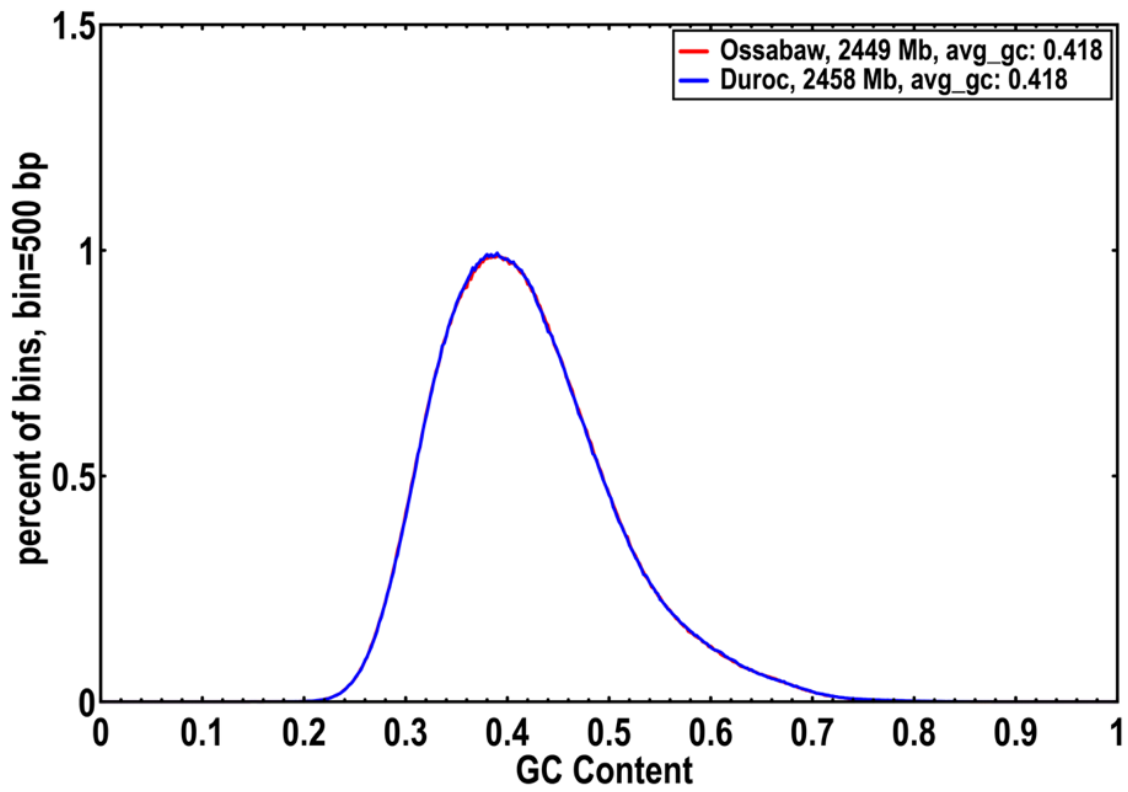

Figure S3. GC content distribution of Ossabaw and Duroc genomes with 500 bp bins, Related to Figure 1.

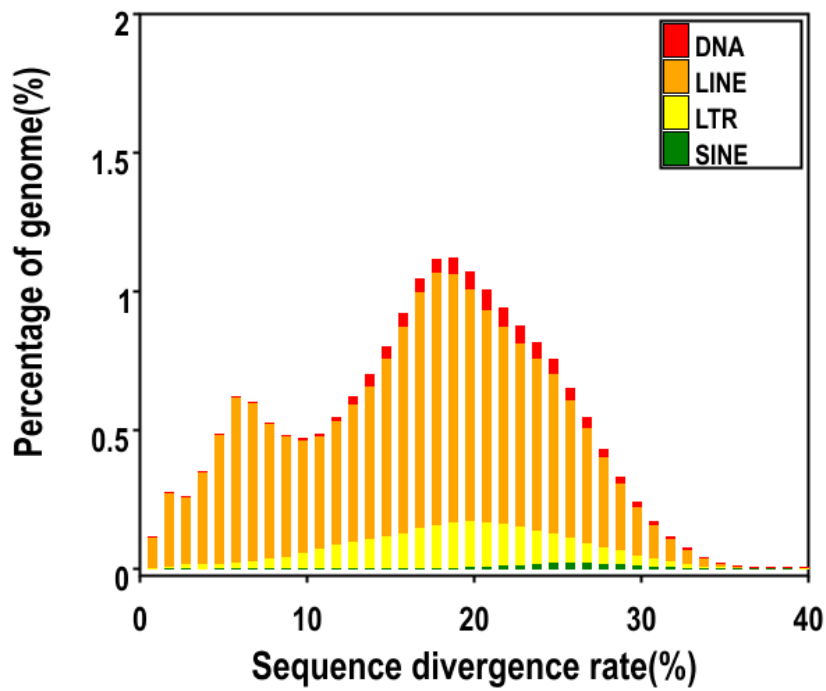

**Figure S4. Sequence divergence distribution of predicted TEs in ossabaw pig genome compared to Rebase database, Related to Figure 1.**

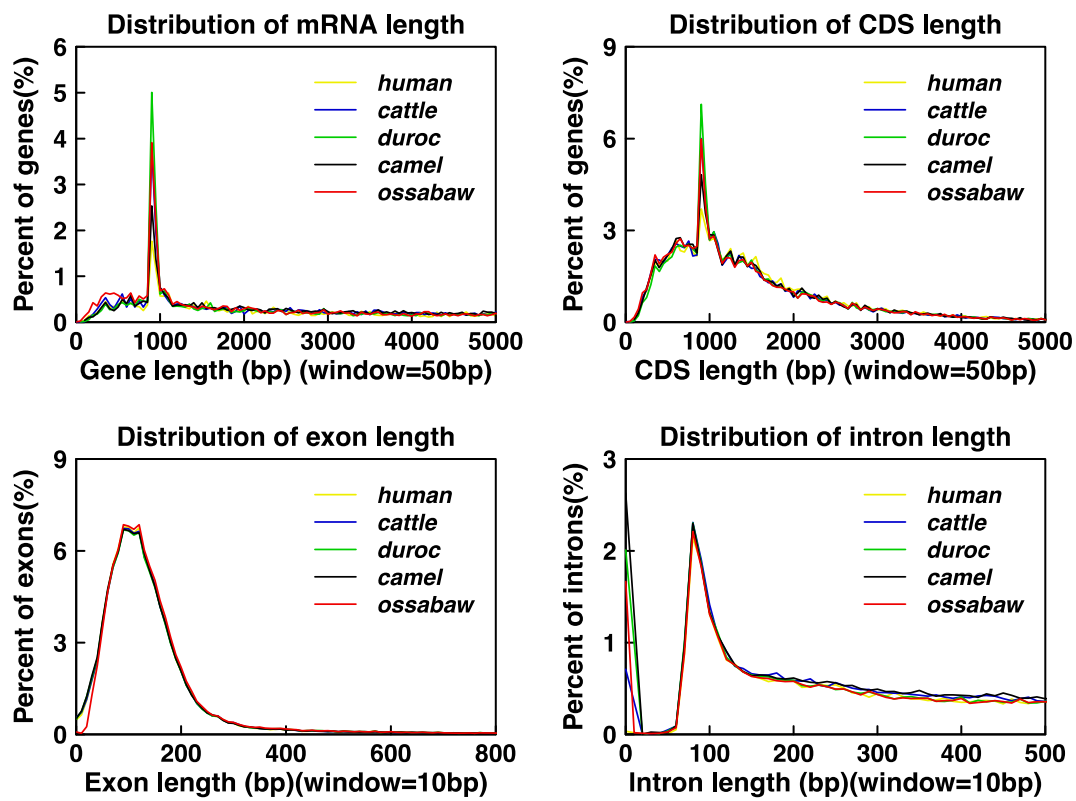

**Figure S5. Gene, CDS (coding sequences), exon and intron length distribution of Ossabaw pig predicted genes compared to Duroc, Human, Cattle and Camel, Related to Figure 1.**

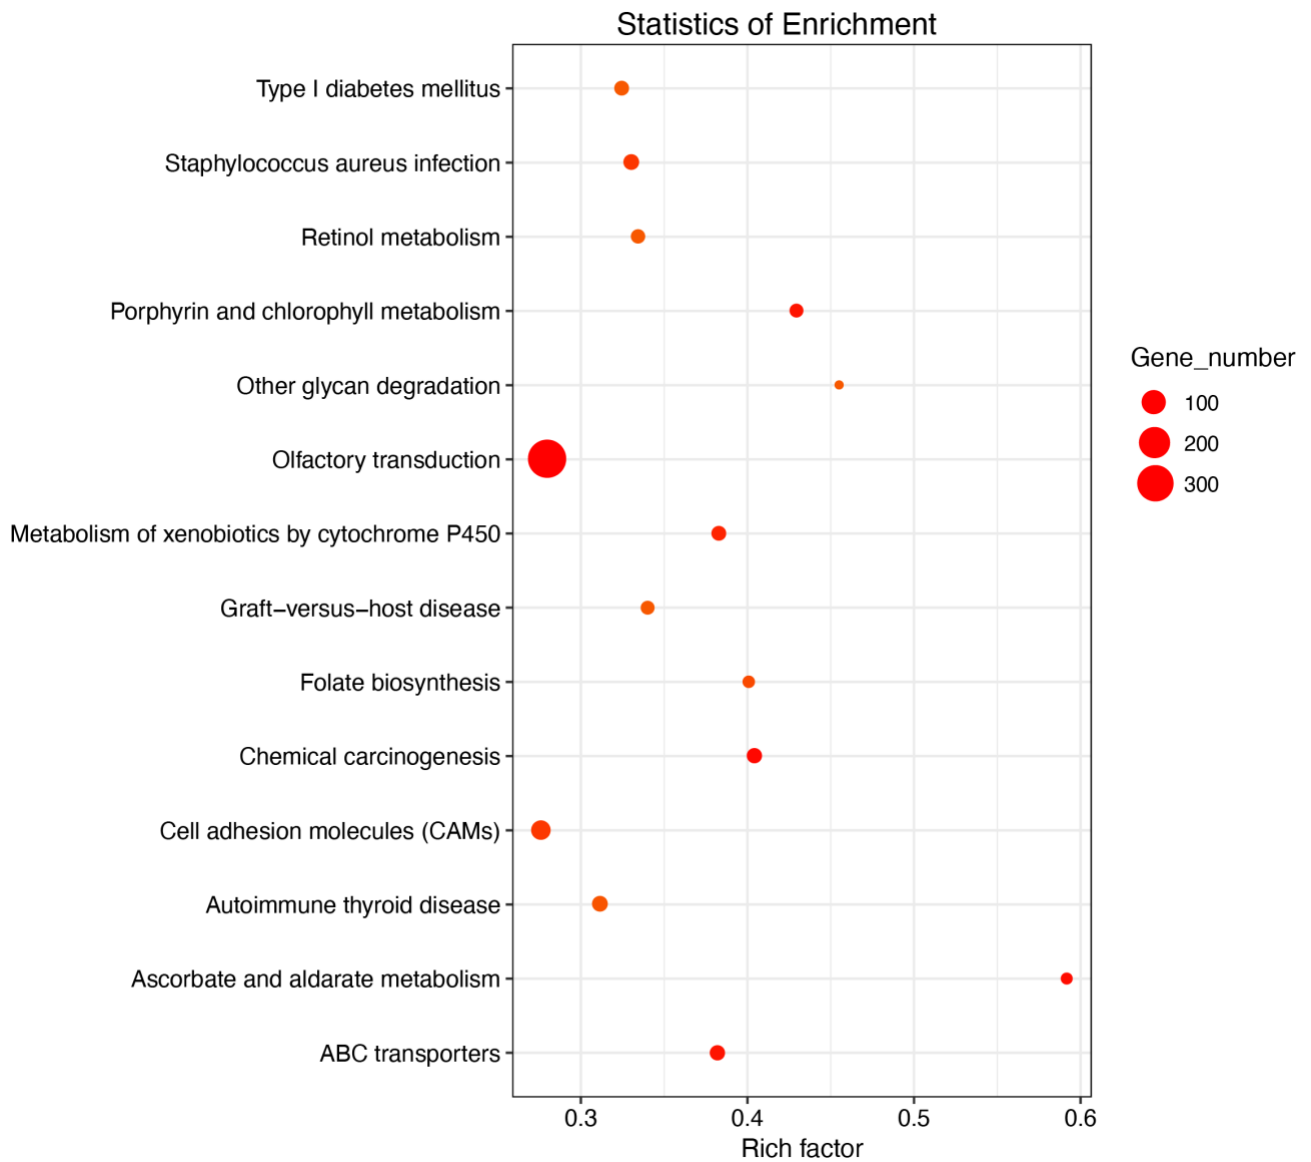

**Figure S6. Top 20 pathways (based on q-value increase) of 1,811 genes with heterozygous SNPs, Related to Figure 1. All *q*-values are below 0.05**

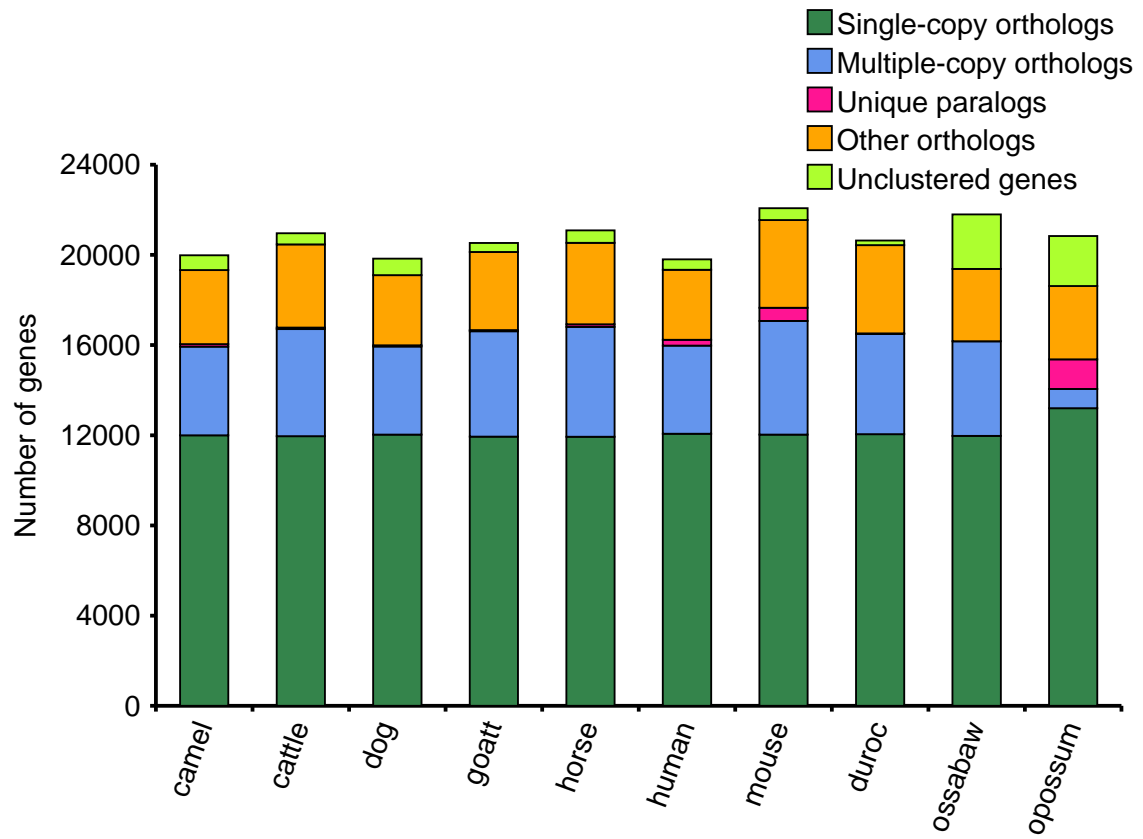

**Figure S7. Gene family clusters in ten representative mammalian species, Related to Figure 2.**

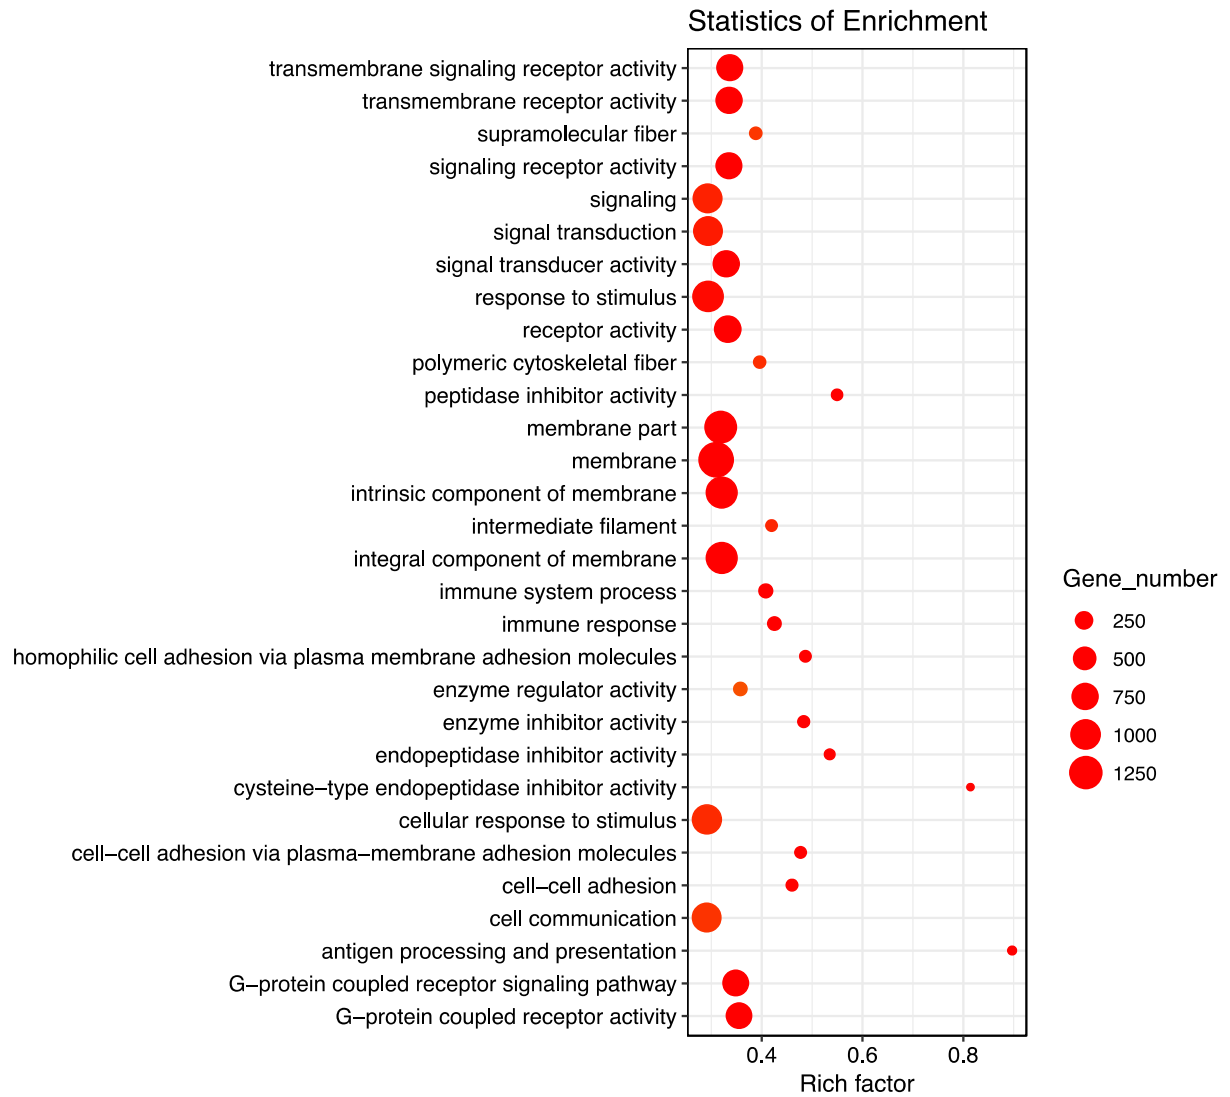

**Figure S8. Top 30 enriched GO terms of fast evolved candidate genes, Related to Figure 2.** All enrichment  $q$ -values are below 0.05

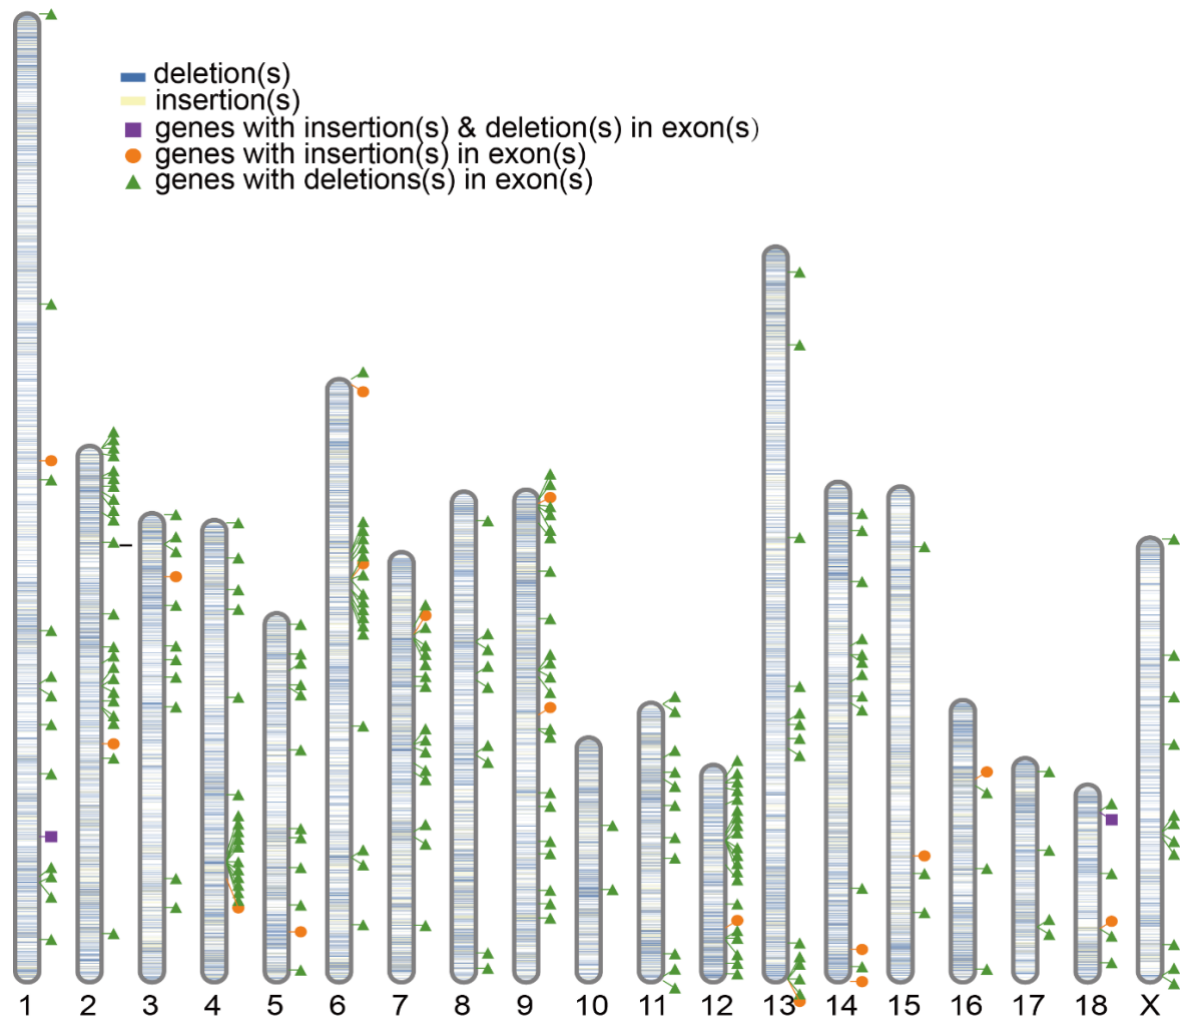

**Figure S9. Indels distributions and genes with indels located in exon regions, Related to Figure 3.**



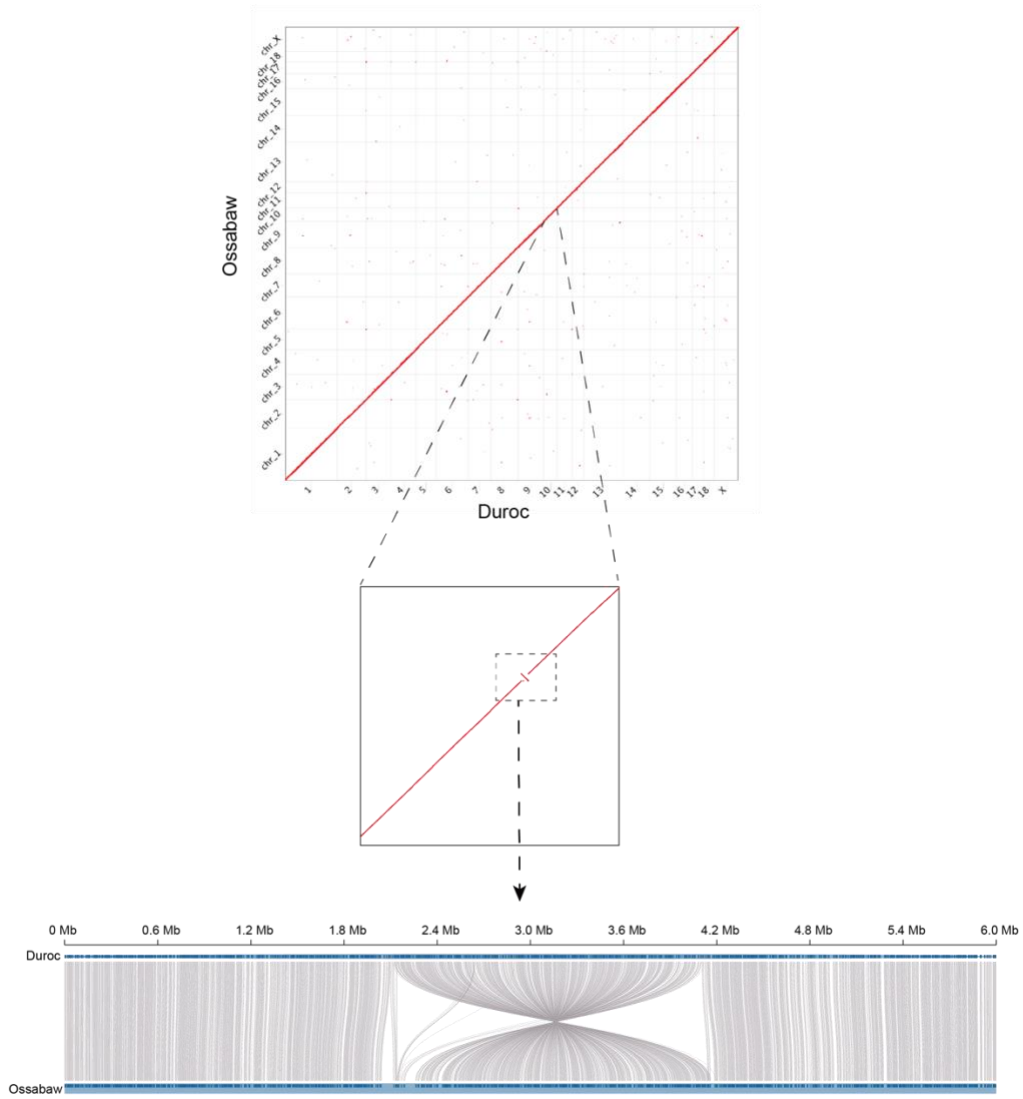

**Figure S10. Inversion between Ossabaw and Duroc genome on chromosome 10, Related to Figure 3.**

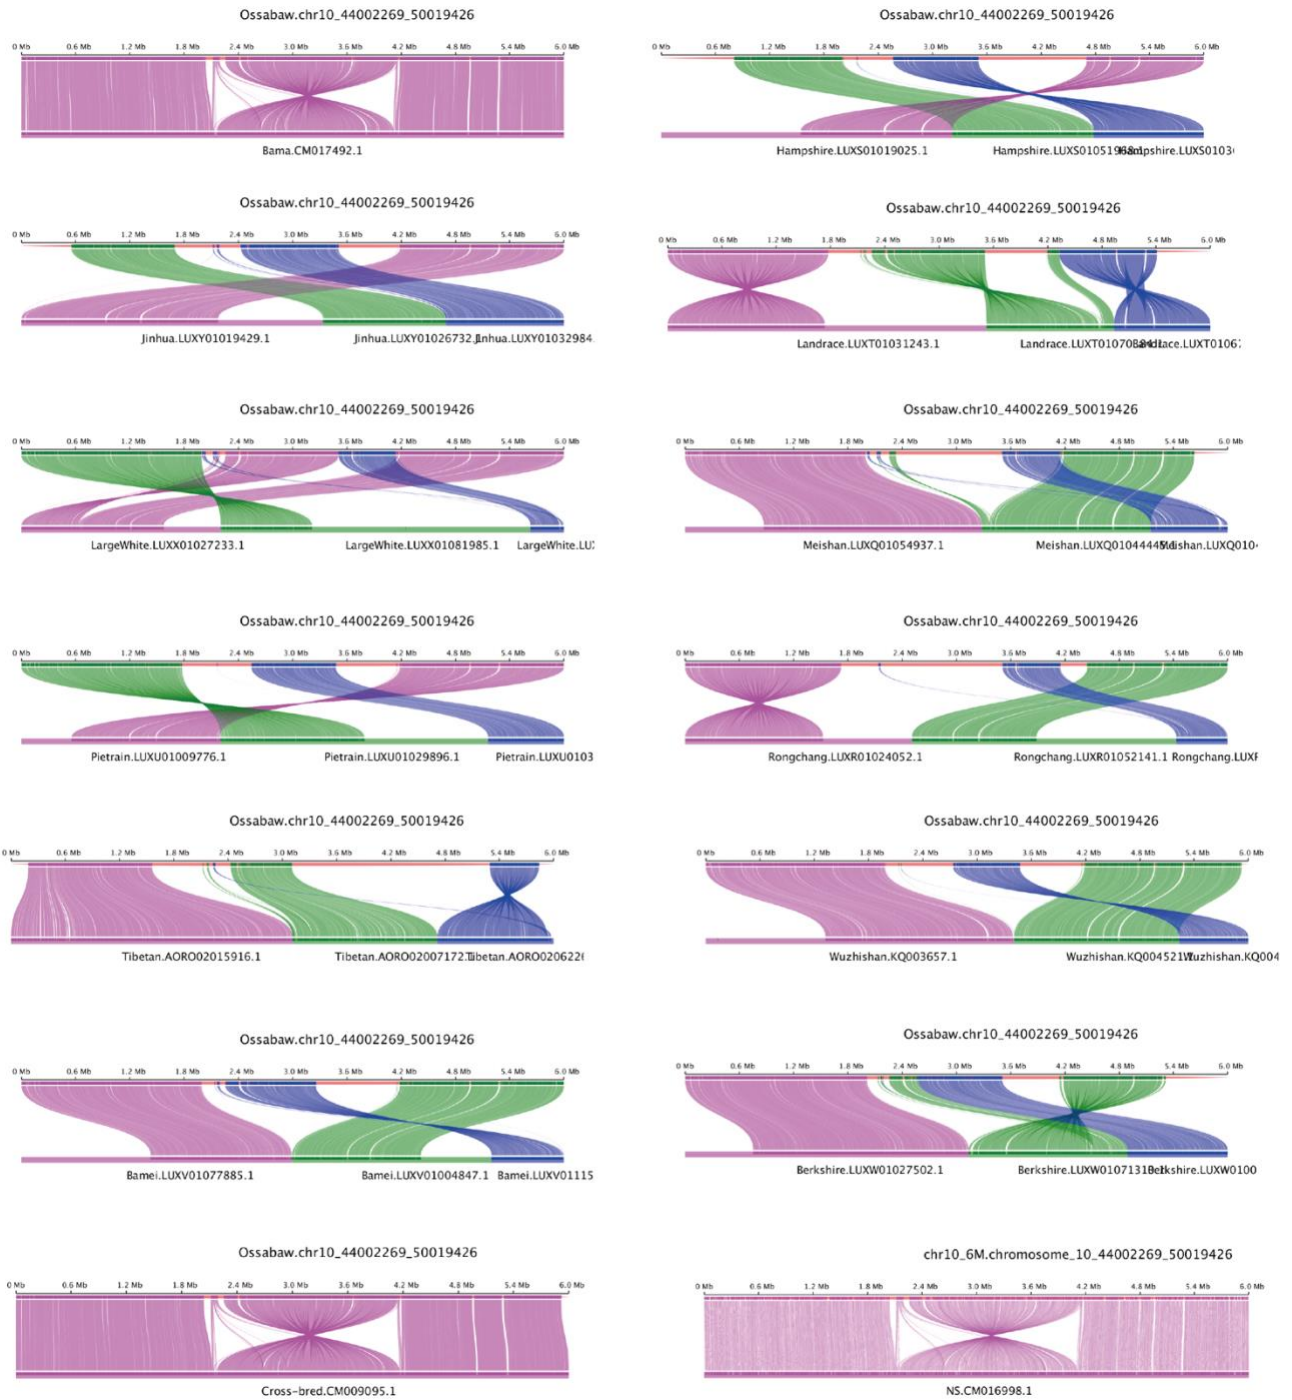

**Figure S11. Comparison of the ~2Mb inversion with 14 other pig breeds. Related to Figure 3.**

## BUSCO Assessment Results

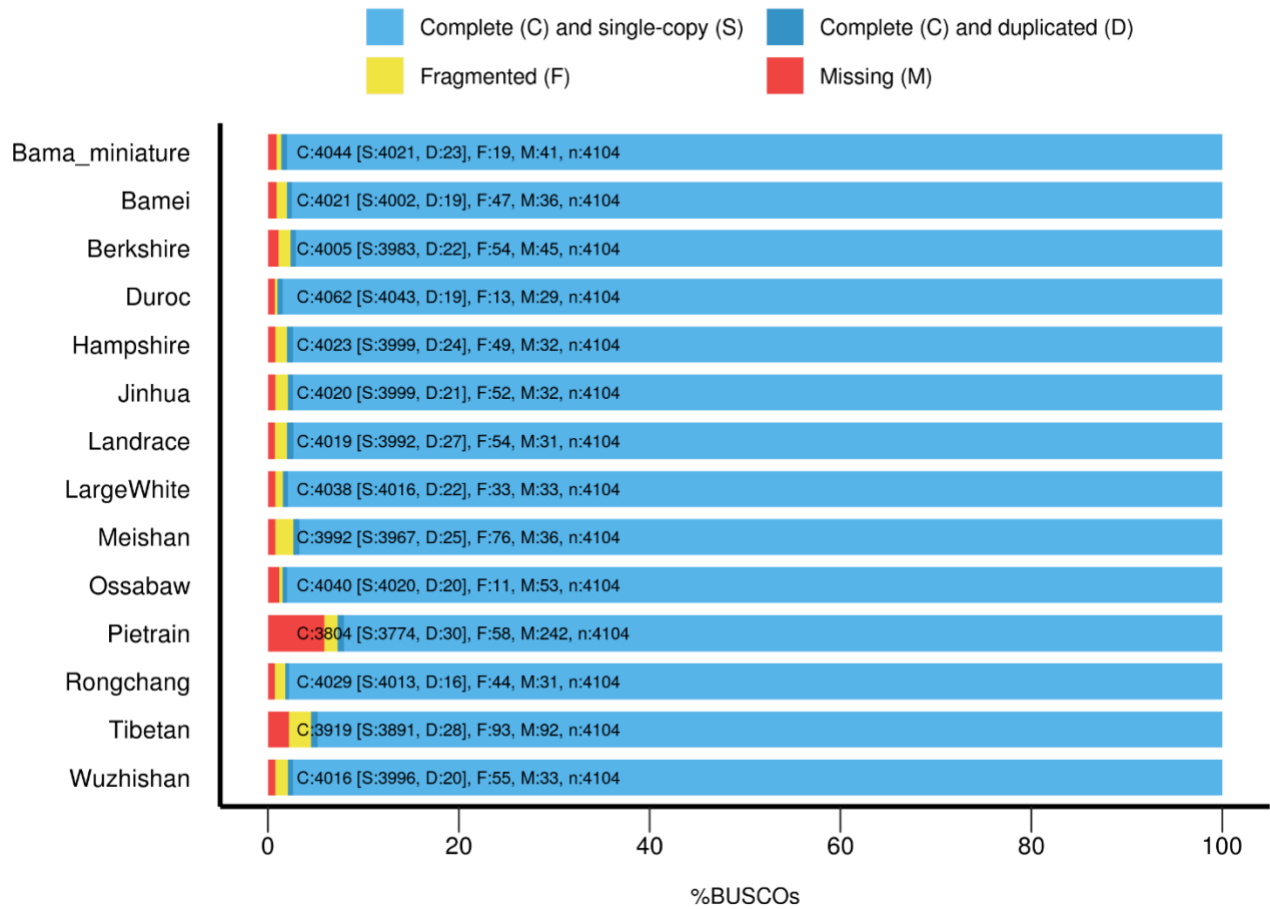

**Figure S12. BUSCO assessment of genes of 14 pig breeds, Related to Figure 4.**

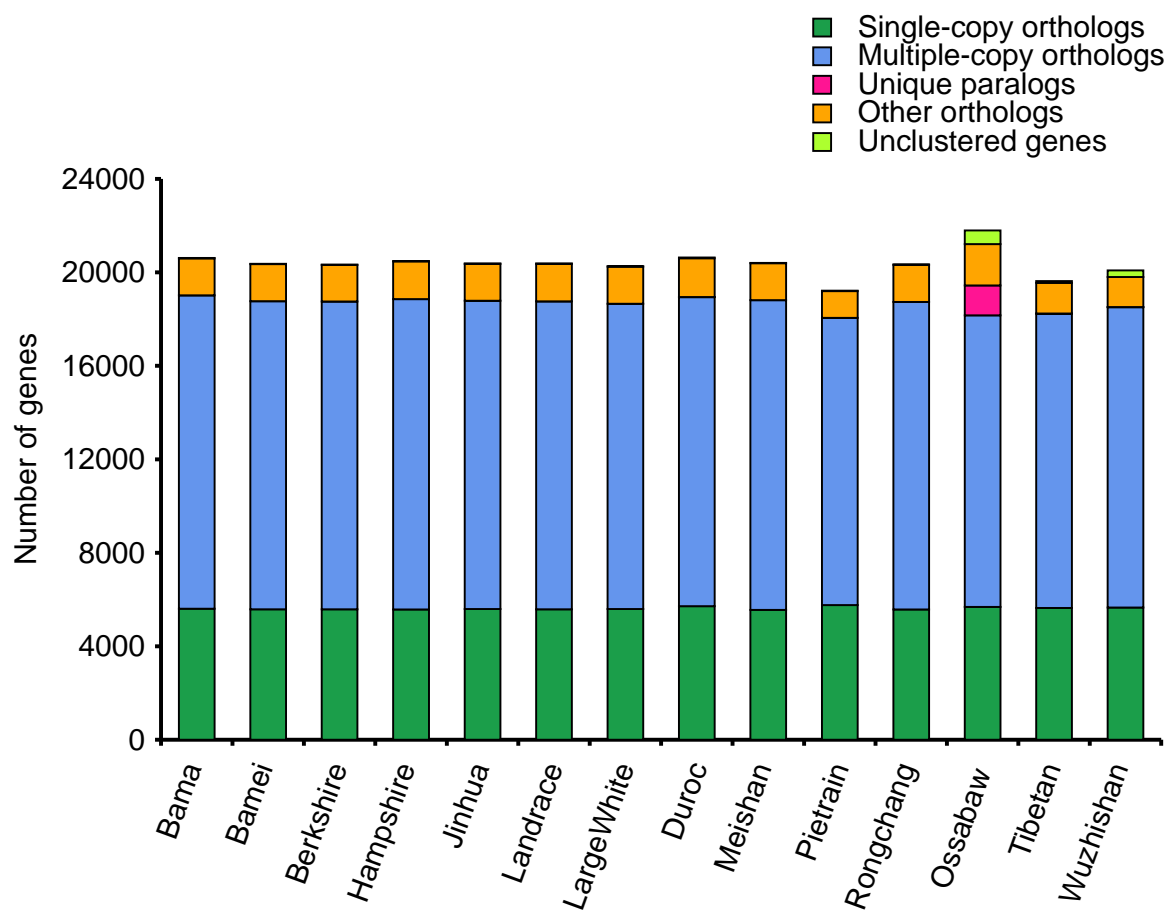

**Figure S13. Gene family clusters among 14 pig breeds, Related to Figure 4.**

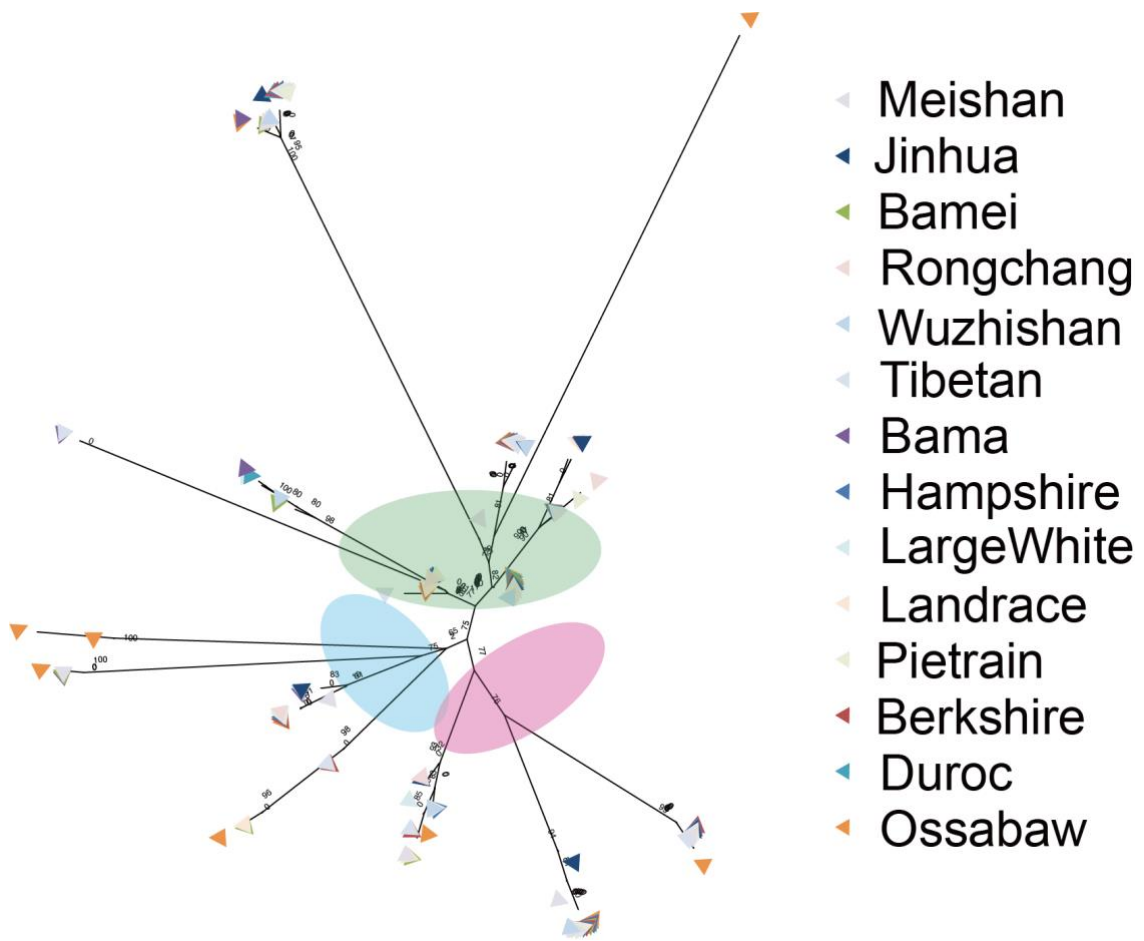

**Figure S14. Expansion of Cytochrome c gene, Related to Figure 4.**

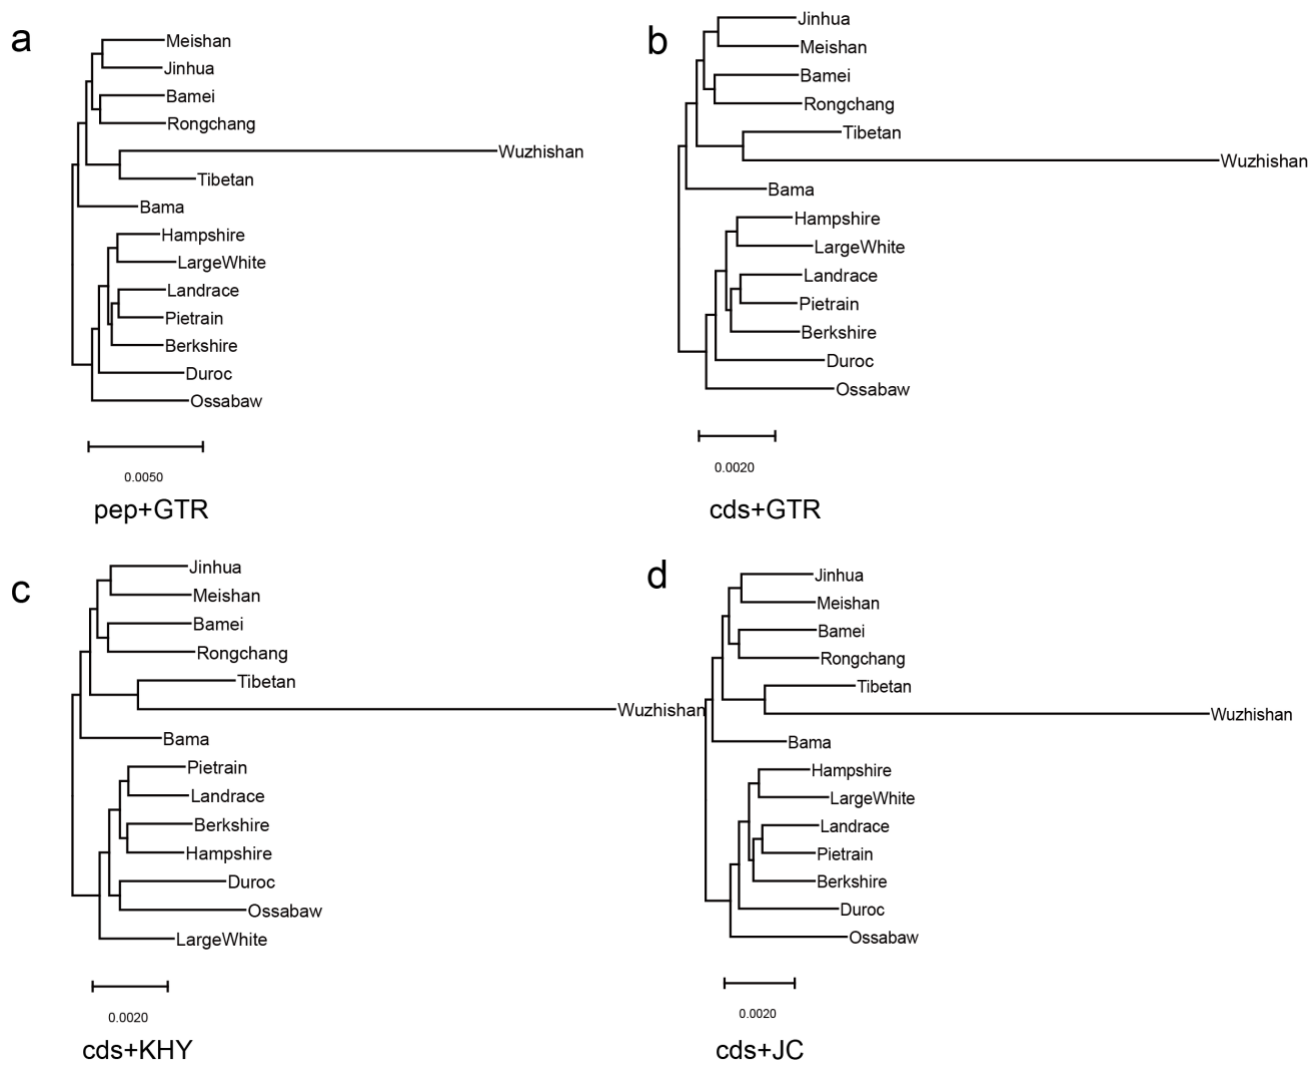

**Figure S15. Phylogenetic tree of 14 pig breeds by using different models, Related to Figure 4.**

pep+GTR: Tree constructed using protein sequences with GTR model. cds+GTR, cds+HKY and cds+JC: Trees constructed using coding sequences (nucleotide sequences) with GTR, HKY and JC models respectively.

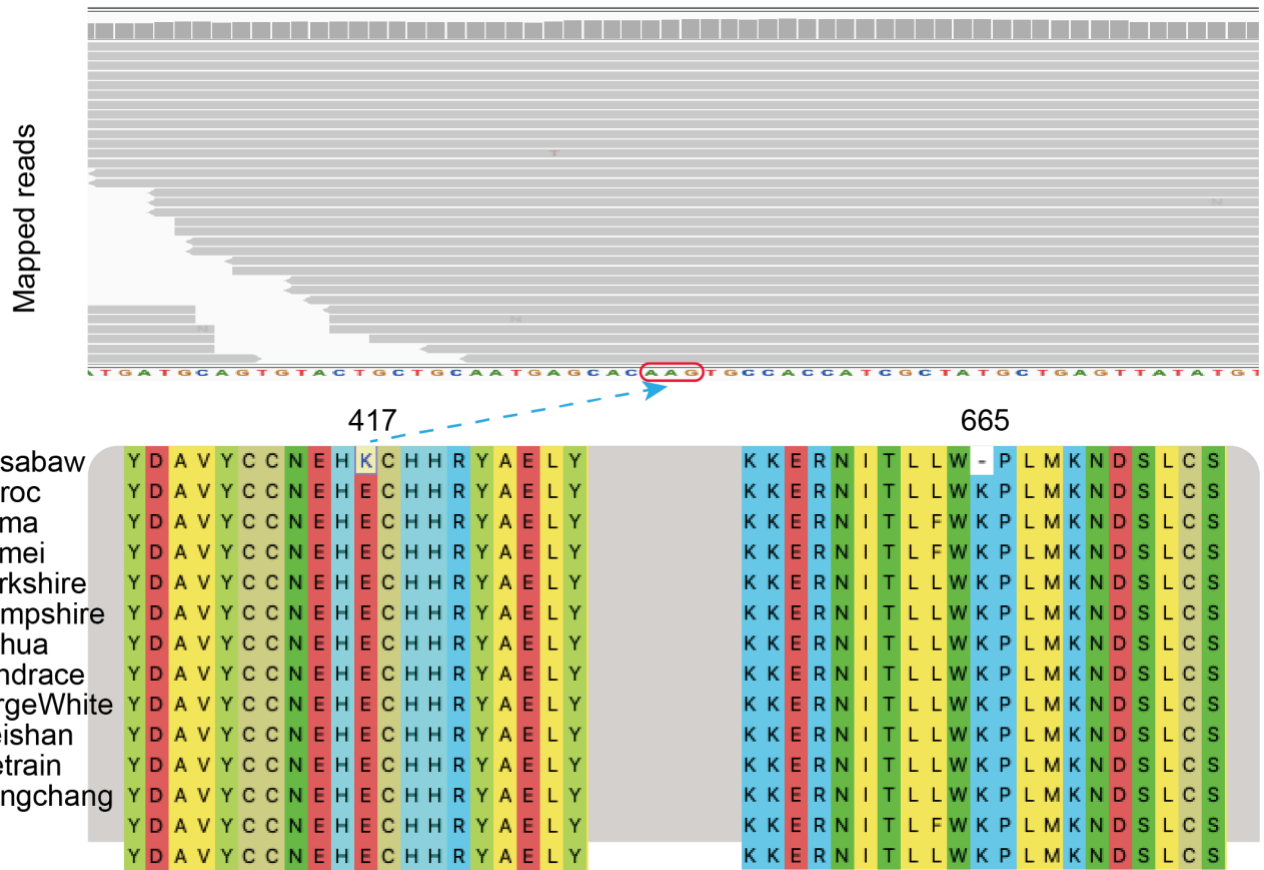

Figure S16. Reads mapping of first positively selected site of *LEPR* gene, Related to Figure 4.







## Supplementary Tables:

**Table S1. Statistics of sequencing raw data for Ossabaw pig, Related to Figure 1**

| Sequencing platform | Libraries | Total Data (Gb) | Coverage (X) |
|---------------------|-----------|-----------------|--------------|
| BGISEQ-500          | stLFR     | 305.83          | 122.33       |
| GridION X5          | ONT       | 24.18           | 9.67         |
| Total               | \         | 330.01          | 132.00       |

**Table S2. Genome assembly summary of Ossabaw pig (V4), Related to Figure 1.**

| V4                    | Scaffold      | Contig        |
|-----------------------|---------------|---------------|
| Total length of (bp): | 2,454,571,501 | 2,452,057,832 |
| Gap number (bp):      | 2,513,669     | 0             |
| Average length (bp):  | 214,017.92    | 198,274.27    |
| N50 Length (bp):      | 22,308,774    | 6,028,600     |
| N90 Length (bp):      | 5,113,492     | 1,229,594     |
| Maximum length (bp):  | 79,055,197    | 36,004,294    |
| GC content is (%):    | 41.91         | 41.91         |

**Table S3. Comparison of Ossabaw pig genome with published other breed pig genomes, Related to Figure 1.**

| Breed                             | NCBI accession  | Total length(bp)     | Total ungapped length(bp) | Scaffold N50(bp)   | Contig N50(bp)   |
|-----------------------------------|-----------------|----------------------|---------------------------|--------------------|------------------|
| Meishan                           | GCA_017957985.1 | 2,510,037,796        | 2,493,974,684             | 138,968,154        | 51,011,532       |
| Duroc                             | GCA_000003025.6 | 2,501,912,388        | 2,472,047,747             | 88,231,837         | 48,231,277       |
| Duroc (excluding Y)               | GCA_000003025.6 | 2,458,364,560        | 2,456,479,391             | 138,966,237        | 41,891,233       |
| Cross bred                        | GCA_006511355.2 | 2,755,438,182        | 2,623,130,238             | 131,458,098        | 6,372,407        |
| <b>Ossabaw(V4)</b>                | /               | <b>2,454,571,501</b> | <b>2,452,057,832</b>      | <b>22,308,774</b>  | <b>6,028,600</b> |
| <b>Ossabaw(V5)</b>                | /               | <b>2,455,685,401</b> | <b>2,452,057,832</b>      | <b>140,684,285</b> | <b>6,028,600</b> |
| NS                                | GCA_006511355.2 | 2,479,330,878        | 2,449,733,784             | 142,372,574        | 594,997          |
| Bama miniature                    | GCA_007644095.1 | 2,491,053,062        | 2,491,053,062             | 140,438,739        | 1,009,524        |
| Hampshire                         | GCA_001700165.1 | 2,437,109,612        | 2,418,011,428             | 1,550,023          | 102,417          |
| Jinhua                            | GCA_001700295.1 | 2,453,702,738        | 2,433,032,022             | 1,478,908          | 95,227           |
| Berkshire                         | GCA_001700575.1 | 2,434,706,773        | 2,414,739,650             | 1,655,397          | 94,651           |
| LargeWhite                        | GCA_001700135.1 | 2,457,907,103        | 2,430,896,979             | 2,441,555          | 88,831           |
| Landrace                          | GCA_001700215.1 | 2,440,981,886        | 2,420,570,845             | 1,407,841          | 88,142           |
| Pietrain                          | GCA_001700255.1 | 2,438,316,299        | 2,415,062,022             | 1,663,542          | 80,611           |
| Rongchang                         | GCA_001700155.1 | 2,459,027,728        | 2,429,730,895             | 2,325,000          | 79,093           |
| Bamei                             | GCA_001700235.1 | 2,460,755,741        | 2,433,636,520             | 1,529,027          | 70,893           |
| Meishan                           | GCA_001700195.1 | 2,467,495,771        | 2,467,495,771             | 1,248,180          | 63,263           |
| Tibetan                           | GCA_000472085.2 | 2,437,742,524        | 2,379,878,366             | 861,885            | 57,199           |
| Wuzhishan                         | GCA_000325925.2 | 2,508,912,457        | 2,453,484,489             | 5,853,977          | 31,939           |
| Ellegaard<br>Gottingen<br>minipig | GCA_000331475.1 | 2,358,017,222        | 2,358,017,222             | 22,008             | 22,008           |
| Goettingen                        | GCA_001292865.1 | 2,611,360,562        | 2,043,668,444             | 153,651,326        | 17,259           |

Note: The Duroc reference genome is based on a female Duroc sow with a Y chromosome added from “WTSI\_X\_Y\_pig V2 ([https://www.ncbi.nlm.nih.gov/assembly/GCA\\_900119615.2/#/st](https://www.ncbi.nlm.nih.gov/assembly/GCA_900119615.2/#/st))”.

**Table S4. Evaluation of base accuracy by calling SNPs and INDELs in Ossabaw pig genome, Related to Figure 1.**

|        | Heterozygous<br>SNPs | Homozygous<br>SNPs | Heterozygous<br>INDELs | Homozygous<br>INDELs | Base inaccuracy |
|--------|----------------------|--------------------|------------------------|----------------------|-----------------|
| Number | 4,039,107            | 4,298              | 951,643                | 1,456                | 0.0002%         |

**Table S5. Length of assembled 19 chromosomes of Ossabaw compared to Duroc, Related to Figure 1.**

| Chromosome ID<br>Ossabaw/Duroc | Length (bp)<br>Ossabaw/Duroc | Percentage (%)<br>(Ossabaw/Duroc) |
|--------------------------------|------------------------------|-----------------------------------|
| chromosome_1/ Chromosome_1     | 278,675,875/274,330,532      | 101.58                            |
| chromosome_2/ Chromosome_2     | 151,395,492/151,935,994      | 99.64                             |
| chromosome_3/ Chromosome_3     | 135,322,977/132,848,913      | 101.86                            |
| chromosome_4/ Chromosome_4     | 132,404,064/130,910,915      | 101.14                            |
| chromosome_5/ Chromosome_5     | 107,929,519/104,526,007      | 103.26                            |
| chromosome_6/ Chromosome_6     | 173,403,329/170,843,587      | 101.50                            |
| chromosome_7/ Chromosome_7     | 122,493,303/121,844,099      | 100.53                            |
| chromosome_8/ Chromosome_8     | 140,684,285/138,966,237      | 101.24                            |
| chromosome_9/ Chromosome_9     | 140,013,607/139,512,083      | 100.36                            |
| chromosome_10/ Chromosome_10   | 72,724,907/69,359,453        | 104.85                            |
| chromosome_11/ Chromosome_11   | 80,030,521/79,169,978        | 101.09                            |
| chromosome_12/ Chromosome_12   | 62,094,181/61,602,749        | 100.80                            |
| chromosome_13/ Chromosome_13   | 209,947,648/208,334,590      | 100.77                            |
| chromosome_14/ Chromosome_14   | 143,392,520/141,755,446      | 101.15                            |
| chromosome_15/ Chromosome_15   | 141,751,623/140,412,725      | 100.95                            |
| chromosome_16/ Chromosome_16   | 80,762,977/79,944,280        | 101.02                            |
| chromosome_17/ Chromosome_17   | 64,016,008/63,494,081        | 100.82                            |
| chromosome_18/ Chromosome_18   | 56,7383,42/55,982,971        | 101.35                            |
| chromosome_X/ Chromosome_X     | 128,445,696/125,939,595      | 101.99                            |

**Table S6. BUSCO assessment of assembled Ossabaw genome using mamalia\_odb9 database, Related to Figure 1.**

| \                                   | Gene number | Percentage (%) |
|-------------------------------------|-------------|----------------|
| Complete BUSCOs (C)                 | 3,736       | 91.0           |
| Complete and single-copy BUSCOs (S) | 3,716       | 90.5           |
| Complete and duplicated BUSCOs (D)  | 20          | 0.5            |
| Fragmented BUSCOs (F)               | 206         | 5.0            |

|                             |       |       |
|-----------------------------|-------|-------|
| Missing BUSCOs (M)          | 162   | 4.0   |
| Total BUSCO groups searched | 4,104 | 100.0 |

**Table S7. Summary of transposable elements in Ossabaw genome, Related to Figure 1.**

| Type    | Rebase TEs  |             | TE proteins |             | De novo     |             | Combined TEs |             | AL (bp) |
|---------|-------------|-------------|-------------|-------------|-------------|-------------|--------------|-------------|---------|
|         | Length (bp) | % in genome | Length (bp) | % in genome | Length (bp) | % in genome | Length (bp)  | % in genome |         |
| DNA     | 20260987    | 0.826854    | 266596      | 0.01088     | 5057900     | 0.206414    | 24052258     | 0.981577    | 282.75  |
| LINE    | 389704840   | 15.903918   | 188627423   | 7.697916    | 828809784   | 33.823861   | 883295085    | 36.047415   | 422.19  |
| SINE    | 5198497     | 0.212152    | 0           | 0           | 36524       | 0.001491    | 5231832      | 0.213512    | 134.60  |
| LTR     | 62177557    | 2.537476    | 980363      | 0.040009    | 8134913     | 0.331987    | 66140793     | 2.699216    | 366.20  |
| Other   | 360         | 0.000015    | 0           | 0           | 0           | 0           | 360          | 0.000015    | 95.00   |
| Unknown | 0           | 0           | 0           | 0           | 111489      | 0.00455     | 111489       | 0.00455     | 828.00  |
| Total   | 476857263   | 19.460622   | 189871626   | 7.748692    | 838716403   | 34.228152   | 936577450    | 38.221877   | /       |

Note: DNA: DNA Transposons; LINE: Long Interspersed Nuclear Elements; SINE: Short Interspersed Nuclear Elements; LTR: Long Terminal Repeat.

**Table S8. Classes of non-coding RNAs in the Ossabaw genome, Related to Figure 1.**

| Type  | Number | Average length(bp) | Total length(bp) | % of genome |
|-------|--------|--------------------|------------------|-------------|
| miRNA | 825    | 78.5               | 64,759           | 0.0026      |
| tRNA  | 4,320  | 75.68              | 326,923          | 0.0133      |
| rRNA  | 462    | 100.01             | 46,206           | 0.0019      |
| snRNA | 1,608  | 113.35             | 182,274          | 0.0074      |

**Table S9. BUSCO assessment of predicted genes using ammalia\_odb9 database, Related to Figure 1.**

| \                                   | Gene number | Percentage (%) |
|-------------------------------------|-------------|----------------|
| Complete BUSCOs (C)                 | 4,040       | 98.5           |
| Complete and single-copy BUSCOs (S) | 4,020       | 98.0           |
| Complete and duplicated BUSCOs (D)  | 20          | 0.5            |
| Fragmented BUSCOs (F)               | 11          | 0.3            |
| Missing BUSCOs (M)                  | 53          | 1.2            |
| Total BUSCO groups searched         | 4,104       | 100.0          |

**Table S10. Summary of function annotation of predicted genes in Ossabaw genome, Related to Figure 1.**

| \           | Total genes | Swissprot | KEGG   | TrEMBL | Interpro | GO     | All annotated |
|-------------|-------------|-----------|--------|--------|----------|--------|---------------|
| Gene Number | 21,794      | 20,016    | 18,173 | 21,363 | 18,955   | 14,267 | 21,382        |
| Percentage  | 100%        | 91.85%    | 83.39% | 98.02% | 86.97%   | 65.46% | 98.11%        |

**Table S11. Information of downloaded NCBI Duroc data, Related to Figure 1.**

|         | NCBI accession                     | Data size (Gb) |
|---------|------------------------------------|----------------|
| Duroc 1 | SRR5357801, SRR5357802             | 28.02          |
| Duroc 2 | SRR7142641, SRR7142642, SRR7142643 | 25.78          |

**Table S12. Distribution of heterozygous SNPs in Ossabaw pig genome, Related to Figure 1.**

|        | Intergenic | Intron    | Exon   |
|--------|------------|-----------|--------|
| Number | 2,610,736  | 1,431,912 | 33,079 |

**Table S14. List of heterozygous genes related to fatty acid metabolism in Ossabaw pig genome, Related to Figure 1.**

| Gene ID      | Number of SNPs in exons | Description from KEGG database                                                   |
|--------------|-------------------------|----------------------------------------------------------------------------------|
| Ossabaw00174 | 10                      | MAP3K5; mitogen-activated protein kinase kinase kinase 5 isoform X1              |
| Ossabaw00287 | 3                       | cytochrome c oxidase subunit 7C, mitochondrial;                                  |
| Ossabaw00419 | 1                       | zinc-binding dehydrogenase family protein;                                       |
| Ossabaw01443 | 1                       | ABHD17B; protein ABHD17B isoform X1                                              |
| Ossabaw01550 | 5                       | ALDH1B1; aldehyde dehydrogenase X, mitochondrial                                 |
| Ossabaw01589 | 29                      | acyl-coenzyme A amino acid N-acyltransferase 2;                                  |
| Ossabaw01592 | 2                       | LOW QUALITY PROTEIN: bile acid-CoA:amino acid N-acyltransferase-like;            |
| Ossabaw01603 | 2                       | CYCS; cytochrome c                                                               |
| Ossabaw01621 | 1                       | ABCA1; ATP-binding cassette sub-family A member 1                                |
| Ossabaw01623 | 11                      | ABCA1; ATP-binding cassette sub-family A member 1                                |
| Ossabaw01933 | 11                      | RXRA; retinoic acid receptor RXR-alpha isoform X1                                |
| Ossabaw02279 | 2                       | HACD1, PTPLA; 3-hydroxyacyl-CoA dehydratase 1                                    |
| Ossabaw02295 | 2                       | OLAH; LOW QUALITY PROTEIN: S-acyl fatty acid synthase thioesterase, medium chain |
| Ossabaw02795 | 3                       | IRS2; LOW QUALITY PROTEIN: insulin receptor substrate 2                          |
| Ossabaw03020 | 5                       | ERN1; serine/threonine-protein kinase/endoribonuclease IRE1                      |
| Ossabaw03546 | 2                       | PROCA1; protein interacting with cyclin A1                                       |
| Ossabaw03589 | 2                       | CYCS; cytochrome c                                                               |
| Ossabaw03848 | 5                       | ALDH3A2; fatty aldehyde dehydrogenase isoform X2                                 |
| Ossabaw03875 | 9                       | SREBF1; sterol regulatory element-binding protein 1                              |
| Ossabaw04844 | 1                       | ADIPOQ; adiponectin precursor                                                    |

|              |    |                                                                                                          |
|--------------|----|----------------------------------------------------------------------------------------------------------|
| Ossabaw05655 | 1  | MLXIP; MLX-interacting protein isoform X1                                                                |
| Ossabaw05783 | 1  | acetyl-CoA carboxylase-like;                                                                             |
| Ossabaw06450 | 2  | NDUFB8; NADH dehydrogenase [ubiquinone] 1 beta subcomplex subunit 8, mitochondrial                       |
| Ossabaw06553 | 11 | CASP7, Caspase-7; caspase 7                                                                              |
| Ossabaw06569 | 5  | PNLIP; pancreatic triacylglycerol lipase precursor                                                       |
| Ossabaw06571 | 4  | PNLIPRP2; pancreatic lipase-related protein 2 precursor                                                  |
| Ossabaw06624 | 5  | ACADSB; short/branched chain specific acyl-CoA dehydrogenase, mitochondrial                              |
| Ossabaw07574 | 2  | NDUFA10; NADH dehydrogenase [ubiquinone] 1 alpha subcomplex subunit 10, mitochondrial                    |
| Ossabaw07934 | 6  | ADIPOQ; adiponectin, C1Q and collagen domain containing                                                  |
| Ossabaw08145 | 12 | CYTB; cytochrome b                                                                                       |
| Ossabaw08832 | 1  | NDUFB2; NADH dehydrogenase [ubiquinone] 1 beta subcomplex subunit 2, mitochondrial                       |
| Ossabaw08941 | 4  | CYCS; cytochrome c                                                                                       |
| Ossabaw09264 | 2  | CPT1A; carnitine O-palmitoyltransferase 1, liver isoform                                                 |
| Ossabaw10392 | 2  | NDUFA7; NADH dehydrogenase [ubiquinone] 1 alpha subcomplex subunit 7                                     |
| Ossabaw10433 | 2  | cytochrome c-like; K08738 cytochrome c                                                                   |
| Ossabaw10438 | 2  | ACSBG2; long-chain-fatty-acid--CoA ligase ACSBG2                                                         |
| Ossabaw10631 | 1  | cytochrome c-like; K08738 cytochrome c                                                                   |
| Ossabaw10917 | 10 | ALDH7A1; alpha-aminoadipic semialdehyde dehydrogenase                                                    |
| Ossabaw10922 | 1  | putative acetyl-CoA acetyltransferase;                                                                   |
| Ossabaw11199 | 9  | GB18611; uncharacterized LOC726760                                                                       |
| Ossabaw11523 | 5  | cytochrome b-c1 complex subunit 2, mitochondrial; K00415 ubiquinol-cytochrome c reductase core subunit 2 |
| Ossabaw11597 | 44 | uncharacterized protein LOC110241526; K14462 apolipoprotein B                                            |
| Ossabaw11865 | 5  | acyl-CoA dehydrogenase; K00232 acyl-CoA oxidase [EC:1.3.3.6]                                             |
| Ossabaw11979 | 1  | EIF2AK3; eukaryotic translation initiation factor 2-alpha kinase 3                                       |
| Ossabaw12861 | 2  | succinate dehydrogenase [ubiquinone] flavoprotein subunit, mitochondrial;                                |
| Ossabaw13030 | 3  | ALDH9A1; 4-trimethylaminobutyraldehyde dehydrogenase isoform X1                                          |
| Ossabaw15113 | 8  | cytochrome c oxidase subunit 6B1 isoform X2; K02267 cytochrome c oxidase subunit 6b                      |
| Ossabaw16234 | 1  | MECR; trans-2-enoyl-CoA reductase, mitochondrial                                                         |
| Ossabaw16559 | 59 | taurochenodeoxycholic 6 alpha-hydroxylase isoform X1;                                                    |
| Ossabaw16726 | 4  | CPT2; carnitine O-palmitoyltransferase 2, mitochondrial precursor                                        |
| Ossabaw16769 | 10 | taurochenodeoxycholic 6 alpha-hydroxylase isoform X1;                                                    |
| Ossabaw16909 | 3  | ECI2; enoyl-CoA delta isomerase 2, mitochondrial                                                         |
| Ossabaw17660 | 6  | NDUFA4; cytochrome c oxidase subunit NDUFA4                                                              |
| Ossabaw18266 | 5  | ACOX3; peroxisomal acyl-coenzyme A oxidase 3 isoform X1                                                  |
| Ossabaw19289 | 37 | MOGAT2; 2-acylglycerol O-acyltransferase 2                                                               |
| Ossabaw19453 | 1  | ACAT1; acetyl-CoA acetyltransferase, mitochondrial isoform X1                                            |

---

**Table S16. Data information used in this research, Related to Figure 1 and Figure 2.**

| Species        | NCBI accession   |
|----------------|------------------|
| Human          | GCF_000001405.39 |
| Mouse          | GCF_000001635.26 |
| Dog            | GCF_000002285.3  |
| Horse          | GCF_002863925.1  |
| Camel          | GCF_000803125.2  |
| Goat           | GCF_001704415.1  |
| Cattle         | GCF_002263795.1  |
| Duroc          | GCF_000003025.6  |
| opossum        | GCF_000002295.2  |
| Bama_miniature | GCA_007644095.1  |
| Bamei          | GCA_001700235.1  |
| Hampshire      | GCA_001700165.1  |
| Jinhua         | GCA_001700295.1  |
| Landrace       | GCA_001700215.1  |
| LargeWhite     | GCA_001700135.1  |
| Meishan        | GCA_001700195.1  |
| Pietrain       | GCA_001700255.1  |
| Rongchang      | GCA_001700155.1  |
| Tibetan        | GCA_000472085.2  |
| Wuzhishan      | GCA_000325925.2  |

**Table S18. SNPs distribution on each chromosome of the Ossabaw genome, Related to Figure 3.**

| ID            | Total   | Intergenic | Intron  | Exon  |
|---------------|---------|------------|---------|-------|
| chromosome_1  | 473,769 | 311,258    | 159,939 | 2,617 |
| chromosome_10 | 167,754 | 95,443     | 71,602  | 844   |
| chromosome_11 | 76,743  | 53,575     | 23,002  | 166   |
| chromosome_12 | 116,308 | 61,149     | 53,706  | 1,565 |
| chromosome_13 | 265,219 | 184,850    | 79,364  | 1,051 |
| chromosome_14 | 296,218 | 175,999    | 118,637 | 1,889 |
| chromosome_15 | 135,355 | 95,654     | 39,032  | 671   |
| chromosome_16 | 129,810 | 96,163     | 33,370  | 277   |
| chromosome_17 | 133,904 | 74,158     | 58,923  | 835   |
| chromosome_18 | 114,349 | 63,493     | 50,081  | 775   |
| chromosome_2  | 271,177 | 175,442    | 91,760  | 4,255 |
| chromosome_3  | 262,940 | 146,465    | 114,374 | 2,328 |
| chromosome_4  | 210,569 | 134,870    | 74,458  | 1,275 |
| chromosome_5  | 142,822 | 97,503     | 44,379  | 993   |
| chromosome_6  | 360,360 | 215,470    | 141,952 | 3,080 |

|              |         |         |        |       |
|--------------|---------|---------|--------|-------|
| chromosome_7 | 162,343 | 102,515 | 58,036 | 1,831 |
| chromosome_8 | 267,747 | 167,932 | 98,799 | 1,134 |
| chromosome_9 | 165,548 | 112,351 | 51,685 | 1,531 |
| chromosome_X | 54,350  | 34,965  | 19,042 | 370   |

**Table S20. Eight high density regions larger than 5 Mb with consecutive 500 kb bins, Related to Figure 3.**

| Chr | Start       | End         |
|-----|-------------|-------------|
| 1   | 235,500,001 | 247,000,000 |
| 12  | 42,000,001  | 48,000,000  |
| 14  | 106,500,001 | 115,500,000 |
| 2   | 60,500,001  | 69,000,000  |
| 2   | 72,500,001  | 82,000,000  |
| 2   | 500,001     | 8,500,000   |
| 6   | 80,500,000  | 86,500,000  |
| 7   | 19,500,001  | 25,500,000  |

**Table S22. Obesity related to genes with indels in exons, Related to Figure 3.**

| Gene ID        | Gene symbol |
|----------------|-------------|
| NP_001159788.1 | MNAT1       |
| XP_020919517.1 | KDM4C       |
| NP_001026948.1 | PLIN3       |
| NP_001106758.1 | LDHB        |
| NP_001243699.1 | NLRP3       |
| XP_020938133.1 | MUC6        |
| XP_020938242.1 | MUC5AC      |
| XP_020938243.1 | MUC2        |
| XP_020939610.1 | ADGRE1      |
| XP_020939713.1 | PLIN4       |
| XP_020941596.1 | PRKAR1B     |
| XP_020942837.1 | REV1        |
| XP_020943636.1 | MUC12       |
| XP_003125633.3 | CNGB3       |
| XP_003361737.2 | COLEC10     |
| XP_020945388.1 | MUC1        |
| XP_020946053.1 | PLEC        |
| XP_005664259.1 | MYBPC1      |
| XP_020947029.1 | CELSR1      |
| XP_020948723.1 | PTPRQ       |
| XP_020950053.1 | SPTBN4      |



|                |         |
|----------------|---------|
| XP_020950146.1 | ZNF283  |
| XP_013852615.1 | MESP2   |
| XP_020953956.1 | ACAN    |
| XP_020954735.1 | CD276   |
| XP_020956418.1 | HERC6   |
| XP_020957142.1 | FGA     |
| XP_020957459.1 | GPAT3   |
| XP_005667607.2 | C4BPA   |
| XP_020919077.1 | ABCB5   |
| XP_020919318.1 | TNN     |
| XP_020919401.1 | TDRD5   |
| XP_020957820.1 | CD55    |
| XP_005668066.2 | CYB5R1  |
| XP_020921072.1 | CENPJ   |
| XP_020921243.1 | SUCLA2  |
| XP_020921581.1 | ARHGEF7 |
| XP_020921664.1 | PARP4   |
| XP_003131508.1 | KRT10   |
| XP_005656960.2 | CYTH1   |
| XP_020923541.1 | DNAH9   |
| XP_020923931.1 | MUC4    |
| XP_003483459.2 | UBC     |
| XP_005670496.2 | NEFM    |
| XP_005670835.2 | NEFH    |
| XP_005671024.1 | TARBP1  |
| XP_020928723.1 | RP1L1   |
| XP_020929397.1 | MKI67   |
| XP_020930397.1 | PLCD4   |
| XP_005672486.2 | RICTOR  |
| XP_020932479.1 | NAIP    |
| XP_020933695.1 | RRBP1   |
| XP_020937495.1 | FMN2    |
| NP_999164.2    | DUOX2   |
| NP_001116460.1 | HMGR    |
| XP_020946919.1 | EEA1    |
| XP_020949331.1 | CA5A    |
| XP_005663896.2 | APOL3   |

**Table S23. Gene expression (FPKM) of four pseudogenes (Walker et al. 2019), Related to Figure 3.**

| Genes | WD | WD | WD | WD | WD | WD | WD | HHD | HHD | HHD | HHD | HHD | HHD |
|-------|----|----|----|----|----|----|----|-----|-----|-----|-----|-----|-----|
|       | -1 | -2 | -3 | -4 | -5 | -6 | -7 | -1  | -2  | -3  | -4  | -5  | -6  |

|         |   |   |      |      |      |   |      |     |      |      |      |   |      |
|---------|---|---|------|------|------|---|------|-----|------|------|------|---|------|
| NSUN6   | 0 | 0 | 0    | 1.77 | 1.42 | 0 | 0    | 2.3 | 0    | 0    | 0    | 0 | 0    |
| RAB18   | 0 | 0 | 0    | 0    | 0    | 0 | 0    | 0   | 0    | 0    | 1.95 | 0 | 0    |
| SLC39A2 | 0 | 0 | 0    | 0    | 0    | 0 | 0.28 | 0   | 0.12 | 0    | 0.1  | 0 | 0    |
| CUBN    | 0 | 0 | 0.03 | 0    | 0.1  | 0 | 0    | 0   | 0    | 0.11 | 0    | 0 | 0.29 |

**Table S24. Unique gene families in Ossabaw genome with KEGG annotation, Related to Figure 4.**

| Gne KO ID (KEGG) | Copy number | Description                                                              |
|------------------|-------------|--------------------------------------------------------------------------|
| K00522           | 2           | ferritin heavy chain-like                                                |
| K00573           | 157         | PCMT1; protein-L-isoaspartate (D-aspartate) O-methyltransferase          |
| K01142           | 39          | hypothetical protein; exodeoxyribonuclease III                           |
| K01229           | 3           | LCT; lactase; K01229 lactase-phlorizin hydrolase                         |
| K01495           | 3           | GCH1; GTP cyclohydrolase 1                                               |
| K01530           | 1           | probable phospholipid-transporting ATPase IH                             |
| K02737           | 2           | Psmb5; proteasome subunit beta 5                                         |
| K02910           | 17          | uncharacterized LOC103555032; large subunit ribosomal protein L31e       |
| K03231           | 3           | elongation factor 1-alpha 1-like                                         |
| K04257           | 43          | olfactory receptor-like                                                  |
| K04534           | 6           | GNAO1; G protein subunit alpha o1                                        |
| K04810           | 1           | CHRNA9; cholinergic receptor nicotinic alpha 9 subunit                   |
| K04953           | 36          | CNGB3; cyclic nucleotide-gated cation channel beta-3                     |
| K04985           | 70          | PKD1; polycystin 1, transient receptor potential channel interacting     |
| K05030           | 8           | epithelial chloride channel protein-like                                 |
| K05620           | 1           | protein-glutamine gamma-glutamyltransferase E-like                       |
| K05673           | 2           | multidrug resistance-associated protein 4-like                           |
| K06464           | 1           | integrin beta-2-like                                                     |
| K06553           | 1           | immunoglobulin lambda-like polypeptide 5                                 |
| K06554           | 1           | IGLL1; immunoglobulin lambda-like polypeptide 1 precursor                |
| K06634           | 3           | CCNH, Cyclin-H; cyclin H                                                 |
| K08742           | 3           | E3 ubiquitin-protein ligase SIAH2                                        |
| K08857           | 1           | NEK4; serine/threonine-protein kinase Nek4                               |
| K09228           | 12          | uncharacterized LOC101935088; KRAB domain-containing zinc finger protein |
| K10408           | 11          | dynein heavy chain 11, axonemal                                          |
| K10730           | 2           | hypothetical protein; ATP-dependent DNA helicase Q4                      |
| K10798           | 89          | poly [ADP-ribose] polymerase 4-like                                      |
| K11290           | 32          | LRRGT00152; similar to Set alpha                                         |
| K12321           | 1           | olfactory guanylyl cyclase GC-D-like                                     |
| K12322           | 1           | GUCY2F; LOW QUALITY PROTEIN: retinal guanylyl cyclase 2                  |
| K12678           | 1           | hypothetical protein; autotransporter family porin                       |

|        |    |                                                                                 |
|--------|----|---------------------------------------------------------------------------------|
| K13624 | 5  | ceruloplasmin-like                                                              |
| K14861 | 1  | URB1; URB1 ribosome biogenesis 1 homolog                                        |
| K17495 | 22 | CUB and sushi domain-containing protein 1-like                                  |
| K17503 | 4  | PPM1H; protein phosphatase, Mg <sup>2+</sup> /Mn <sup>2+</sup> dependent 1H     |
| K17784 | 2  | MINOS1; MICOS complex subunit MIC10 isoform X1                                  |
| K18080 | 2  | tensin-3                                                                        |
| K18710 | 1  | histone RNA hairpin-binding protein-like                                        |
| K19464 | 3  | hypothetical protein;pleckstrin homology domain-containing family<br>G member 5 |
| K19924 | 1  | SPINK13; serine protease inhibitor Kazal-type 13                                |
| K19941 | 37 | uncharacterized LOC102351696; synapsin                                          |
| K20217 | 3  | ubiquitin-conjugating enzyme E2 E2                                              |
| K21449 | 1  | large adhesin                                                                   |
| K21774 | 2  | Lin37, 1810054G18Rik; lin-37 homolog                                            |

---
